# Supplementary material for: Genome reannotation of the lizard Anolis carolinensis based on 14 adult and embryonic deep transcriptomes
Source: PubMed Central journal article supplement (PMC3561122; doi:10.1186/1471-2164-14-49), 2013-01-23

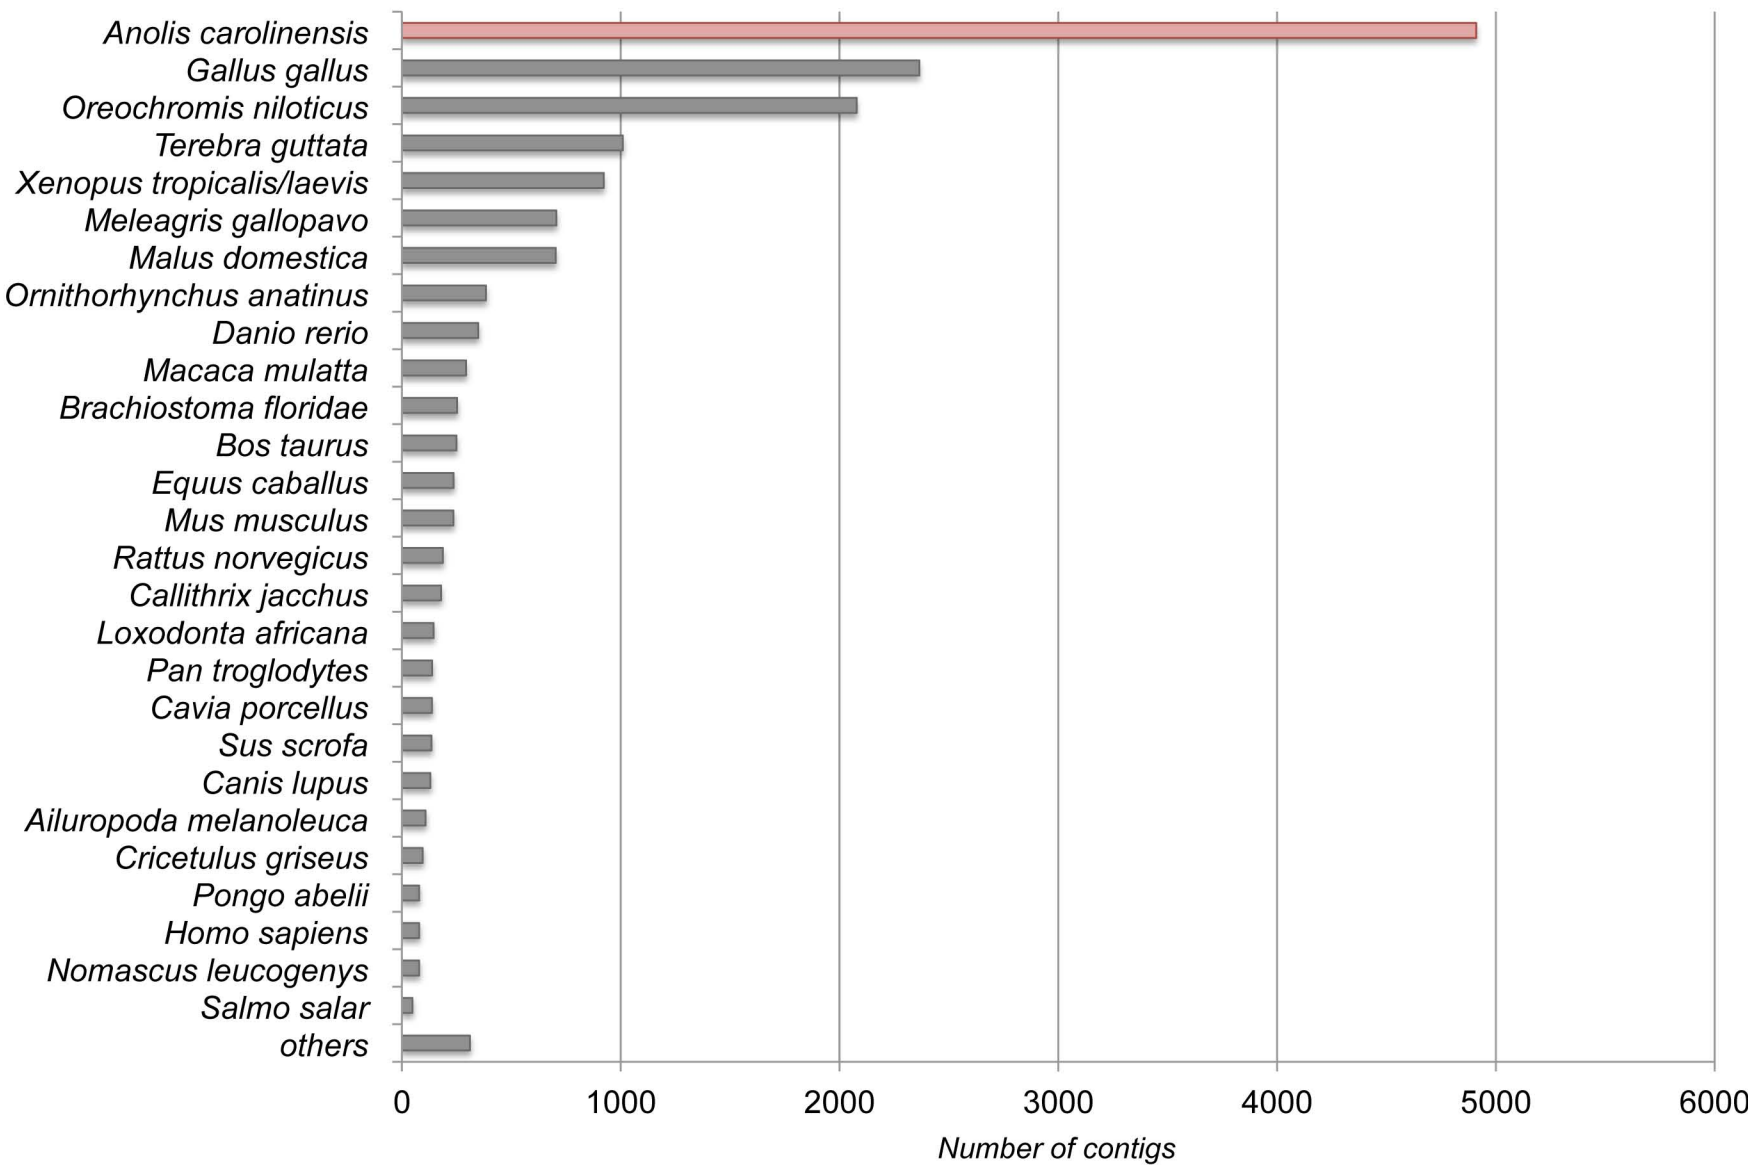

Supplement: 1471-2164-14-49-S5.pdf [file 1471-2164-14-49-S5.pdf]
